# Supplementary material
Source: MDPI journal article supplement (https://www.mdpi.com/2673-4141/2/4/22)
Supplement: s1 [file s1]

## Supplementary Materials

### Hydrogen Sorption Properties of a Novel Refractory Ti-V-Zr-Nb-Mo High Entropy Alloy

Anis Bouzidi, Laetitia Laversenne, Guilherme Zepon, Gavin Vaughan, Vivian Nassif and Claudia Zlotea

Part SI-1: Thermodynamic modelling of the Pressure-Composition-Isotherm for the  $\text{Ti}_{0.30}\text{V}_{0.25}\text{Zr}_{0.10}\text{Nb}_{0.25}\text{Mo}_{0.10}$  composition at 25 °C.

Figure SI-2: SR-XRD pattern together with the corresponding Rietveld refinement for  $\text{Ti}_{0.325}\text{V}_{0.275}\text{Zr}_{0.125}\text{Nb}_{0.275}\text{H}_{1.7}$ .

Figure SI-3: nD pattern and related Rietveld refinement for  $\text{Ti}_{0.325}\text{V}_{0.275}\text{Zr}_{0.125}\text{Nb}_{0.275}\text{D}_{1.7}$ .

Part SI-1: The enthalpy and entropy of the *bcc* and *fcc* phases of the Ti-V-Zr-Nb-Mo alloys were calculated according to the thermodynamic model proposed in [1]. Table SI-1 presents the values of partial molar enthalpy ( $h_i$ ) of the different alloying element *i* for the *bcc* and *fcc* phases. The values for Ti, V, Zr and Nb were reported in [1]. The value for Mo-*bcc* was taken from reference [1] and for Mo-*fcc* was calculated by DFT using the same method described in [1]. Table SI-2 presents the *bcc* and *fcc* bond energies ( $\epsilon_{ij}$ ) for the atomic pairs of the Ti-V-Zr-Nb-Mo. These values were obtained by DFT calculation using the same method described in [1]. The configurational entropy parameters for the *bcc* and *fcc* phases are presented in Table SI-3.

**Table SI-1.** Partial molar enthalpy ( $h_i$ ) of the different alloying element *i* for the *bcc* and *fcc* phases. Values in kJ/mol of H.

|           | $h_i^{bcc}$ | $h_i^{fcc}$ |
|-----------|-------------|-------------|
| <b>Ti</b> | −58         | −64.22      |
| <b>V</b>  | −29.5       | −31.75      |
| <b>Zr</b> | −64         | −74.39      |
| <b>Nb</b> | −35.3       | −40.82      |
| <b>Mo</b> | 15          | 0.79        |

Table SI-2.  $\epsilon_{i-j}^{bcc}$  and  $\epsilon_{i-j}^{fcc}$  bond energies in kJ/mol for the atomic pairs considered in this work.

| $\epsilon_{i-j}^{bcc}$ | Ti         | V          | Zr         | Nb         | Mo         | $\epsilon_{i-j}^{bcc}$ |
|------------------------|------------|------------|------------|------------|------------|------------------------|
|                        | −560421.1  | −591764.2  | −1461425.9 | −1534040.5 | −1609236.0 | <b>Ti</b>              |
| $\epsilon_{i-j}^{fcc}$ |            | −623110.6  | −1492766.4 | −1565384.6 | −1640581.3 | <b>V</b>               |
| <b>Ti</b>              | −373615.0  |            | −2362431.4 | −2435044.2 | −2510238.4 | <b>Zr</b>              |
| <b>V</b>               | −394508.8  | −415403.3  |            | −2507661.1 | −2582856.8 | <b>Nb</b>              |
| <b>Zr</b>              | −974285.1  | −995177.5  | −1574955.1 |            | −2658046.5 | <b>Mo</b>              |
| <b>Nb</b>              | −1022693.3 | −1043586.6 | −1623361.7 | −1671769.0 |            | $\epsilon_{i-j}^{bcc}$ |
| <b>Mo</b>              | −1072820.8 | −1093714.4 | −1673489.3 | −1721896.4 | −1772024.5 |                        |
| $\epsilon_{i-j}^{fcc}$ | <b>Ti</b>  | <b>V</b>   | <b>Zr</b>  | <b>Nb</b>  | <b>Mo</b>  | $\epsilon_{i-j}^{fcc}$ |

**Table SI-3.** Entropy parameters for describing the configurational entropy of the bcc and fcc phases used in this work.

|            | $\theta$ | $r$ |
|------------|----------|-----|
| <i>bcc</i> | 6        | 5   |
| <i>fcc</i> | 2        | 1   |

**Table SI-4.** Plateau enthalpies and plateau entropies for the nominal composition.  $\Delta H_{plat}$  and  $\Delta S_{plat}$  are given in kJ/mol of H and J/K.mol of H, respectively.

| Temperature (°C) | Nominal           |                   |
|------------------|-------------------|-------------------|
|                  | $\Delta H_{plat}$ | $\Delta S_{plat}$ |
| 25               | -38.5             | -76.0             |
| 75               | -38.4             | -77.9             |
| 100              | -38.3             | -78.8             |
| 200              | -38.1             | -81.7             |
| 250              | -38.0             | -82.9             |
| 300              | -37.8             | -84.0             |

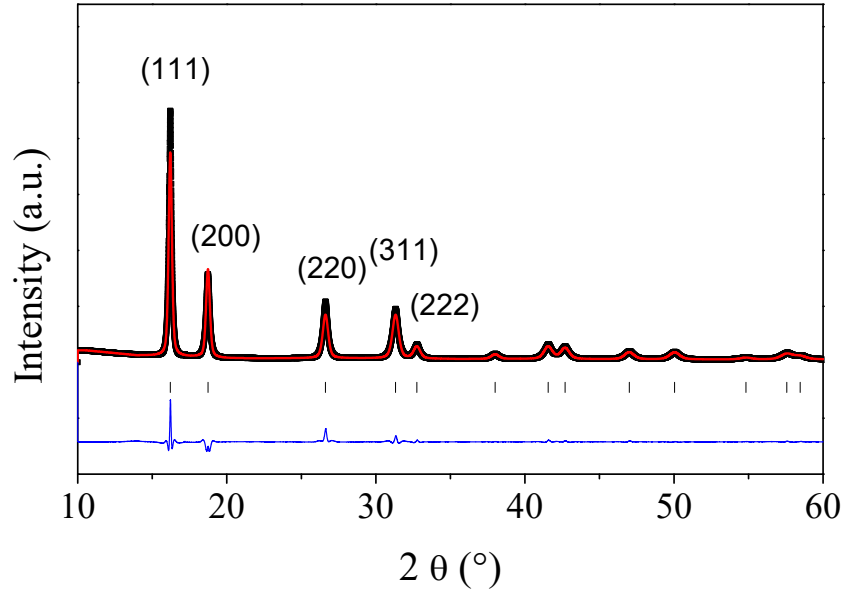

**Figure SI-2.** SR-XRD pattern together with the corresponding Rietveld refinements for  $\text{Ti}_{0.325}\text{V}_{0.275}\text{Zr}_{0.125}\text{Nb}_{0.275}\text{H}_{1.7}$ .

The refinement structural model is a *fcc* structure ( $Fm\bar{3}m$ ) with the four types of metal atoms randomly distributed on the crystallographic sites. The lattice parameter is 4.478(1) Å.

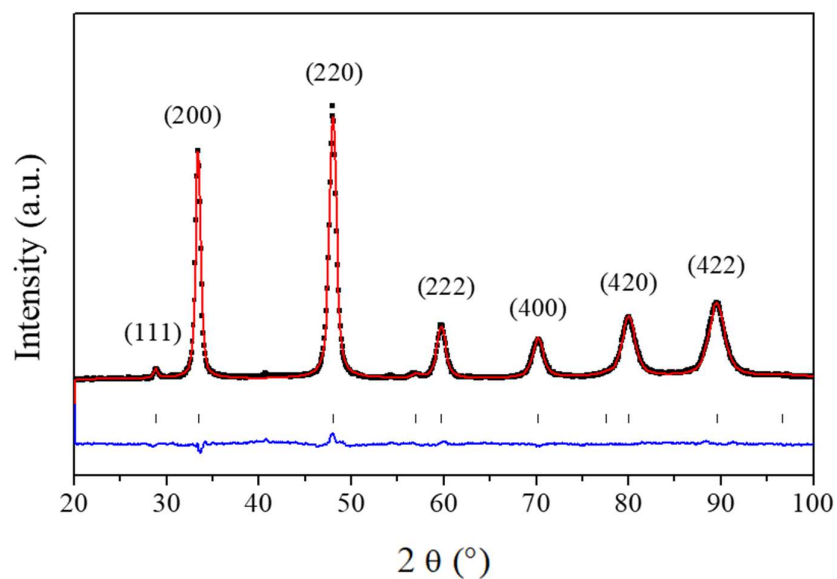

**Figure SI-3.** nD pattern and related Rietveld refinements for  $\text{Ti}_{0.325}\text{V}_{0.275}\text{Zr}_{0.125}\text{Nb}_{0.275}\text{D}_{1.7}$ .

The refinement structural model is a *fcc* structure ( $Fm\bar{3}m$ ) with the four types of metal atoms randomly distributed on the specific crystallographic sites. The lattice parameter is 4.475(1) Å and the deuterium atoms are determined to occupy the tetrahedral interstitial sites of the *fcc* lattice.

**Reference:**

1. Zepon, G.; Silva, B.H.; Zlotea, C.; Botta, W.J.; Champion, Y. Thermodynamic Modelling of Hydrogen-Multicomponent Alloy Systems: Calculating Pressure-Composition-Temperature Diagrams. *Acta Mater.* **2021**, 215, 117070, doi:10.1016/j.actamat.2021.117070.
